# Supplementary material
Source: PubMed Central journal article supplement (PMC4012477)
Supplement: 3f6eece06e33e6e1dc9867c7318a12b4_genetics.113.160663-10.pdf [file 3f6eece06e33e6e1dc9867c7318a12b4_genetics.113.160663-10.pdf]

**Table S1** Number of aligned mRNA reads to the *D. melanogaster* Refseq mRNA.

| Samples | Barcode | Total # of post-filter reads | Mapped to dm3 genome and transcriptome |
|---------|---------|------------------------------|----------------------------------------|
| Control | ACTT    | 1,077,110                    | 239,757                                |
|         | TCGC    | 3,175,833                    | 398,659                                |
| IPC     | CTGG    | 3,118,626                    | 592,440                                |
|         | CGTC    | 3,833,784                    | 417,340                                |

**Tables S2-S5**

Available for download as Excel files at <http://www.genetics.org/lookup/suppl/doi:10.1534/genetics.113.160663/-/DC1>

**Table S2** List of all genes with aligned reads in laser-captured IPC and control samples.

**Table S3** List of 193 IPC-enriched genes with their annotated molecular functions.

**Table S4** Full list of biological functional clusters annotated by DAVID with IPC-enriched transcripts.

**Table S5** List of 109 IPC-enriched genes and their mouse orthologs. The mouse orthologs that have higher expression levels in beta cells compared to other non-beta cell tissues (Ku et al.) are indicated.
