# Supplementary material
Source: PubMed Central journal article supplement (PMC4012477)
Supplement: 88ca49458dbef8486a61f213fa5a8b41_genetics.113.160663-1.pdf [file 88ca49458dbef8486a61f213fa5a8b41_genetics.113.160663-1.pdf]

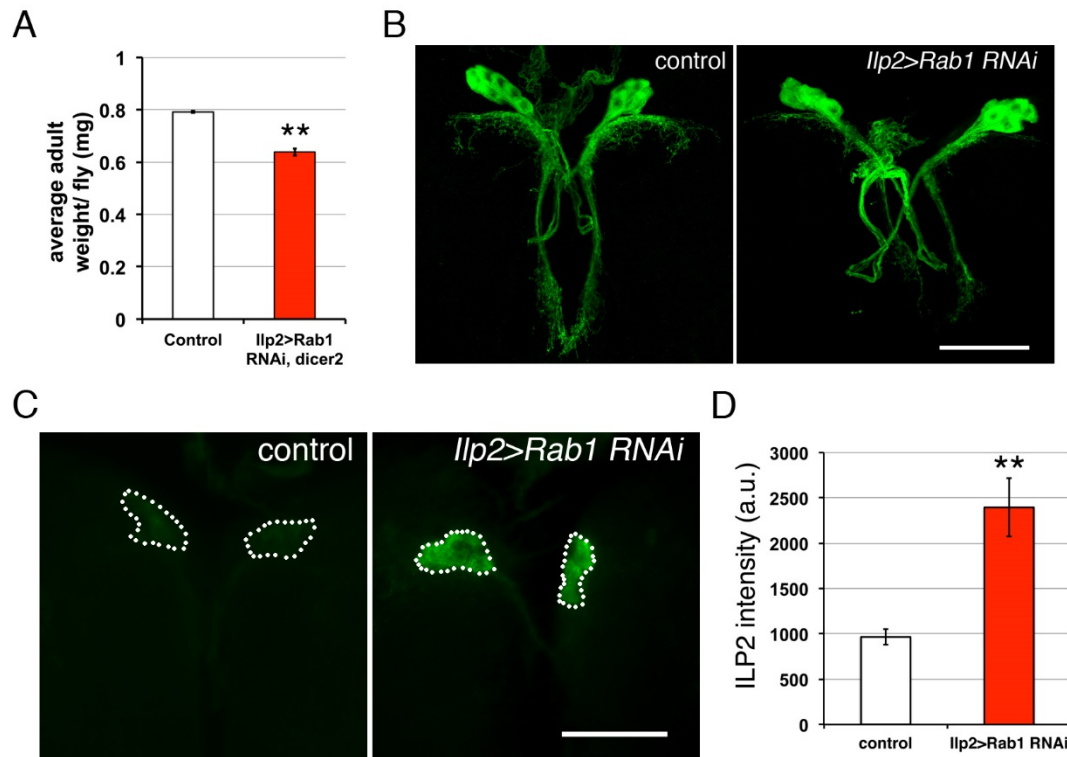

**Figure S3** Expressing Rab1 RNAi in IPCs results in accumulation of ILP2 in IPCs. **(A)** Adult weights were compared between control flies (*Ilp2-Gal4>attP2 control*, n = 63 flies) and flies expressing Rab1 RNAi in IPCs (*Ilp2>Rab1 RNAi, dicer2*; n = 60 flies). **(B)** IPC neurite structure was labeled with *Ilp2>mCD8-GFP* in *Ilp2>Rab1 RNAi, dicer2* and control (*Ilp2>dicer2, attP2 control*) brains. **(C-D)** ILP2 fluorescence intensities in the brain IPC cell bodies were compared between control (n = 8 brains) and *Rab1 RNAi* expressed in IPCs (n = 8 brains). Scale bars: 50 $\mu$ m. Error bar: S.E.M. \*\*p<0.01.
