# Supplementary material
Source: PubMed Central journal article supplement (PMC4012477)
Supplement: 419d6db21d4b2b729ee949720f369b46_genetics.113.160663-9.pdf [file 419d6db21d4b2b729ee949720f369b46_genetics.113.160663-9.pdf]

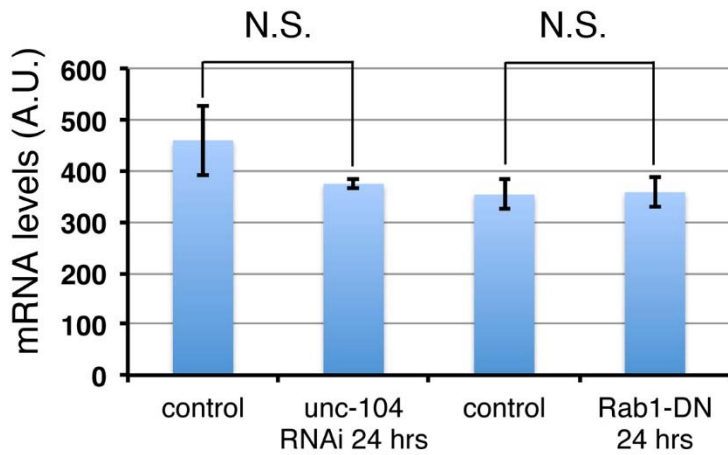

**Figure S2** Measurement of larval brain *Ilp2* transcript levels when *unc-104* mRNA was depleted or Rab1 protein function was inhibited. *Ilp2* transcript levels were compared by quantitative RT-PCR between control and *unc-104* knockdown in IPCs for 24 hrs (*tubGal80<sup>ts</sup>, Ilp2>unc-104 RNAi*), or Rab1 inhibition in IPCs for 24 hrs (*tubGal80<sup>ts</sup>, Ilp2>Rab1-DN*). *Rpl32* was used as an internal control. N.S.: non significant. Error bars represent S.E.M.
