# Supplementary material
Source: PubMed Central journal article supplement (PMC4012477)
Supplement: 829ddf50dad098bc0c0c64ecac12725d_genetics.113.160663-4.pdf [file 829ddf50dad098bc0c0c64ecac12725d_genetics.113.160663-4.pdf]

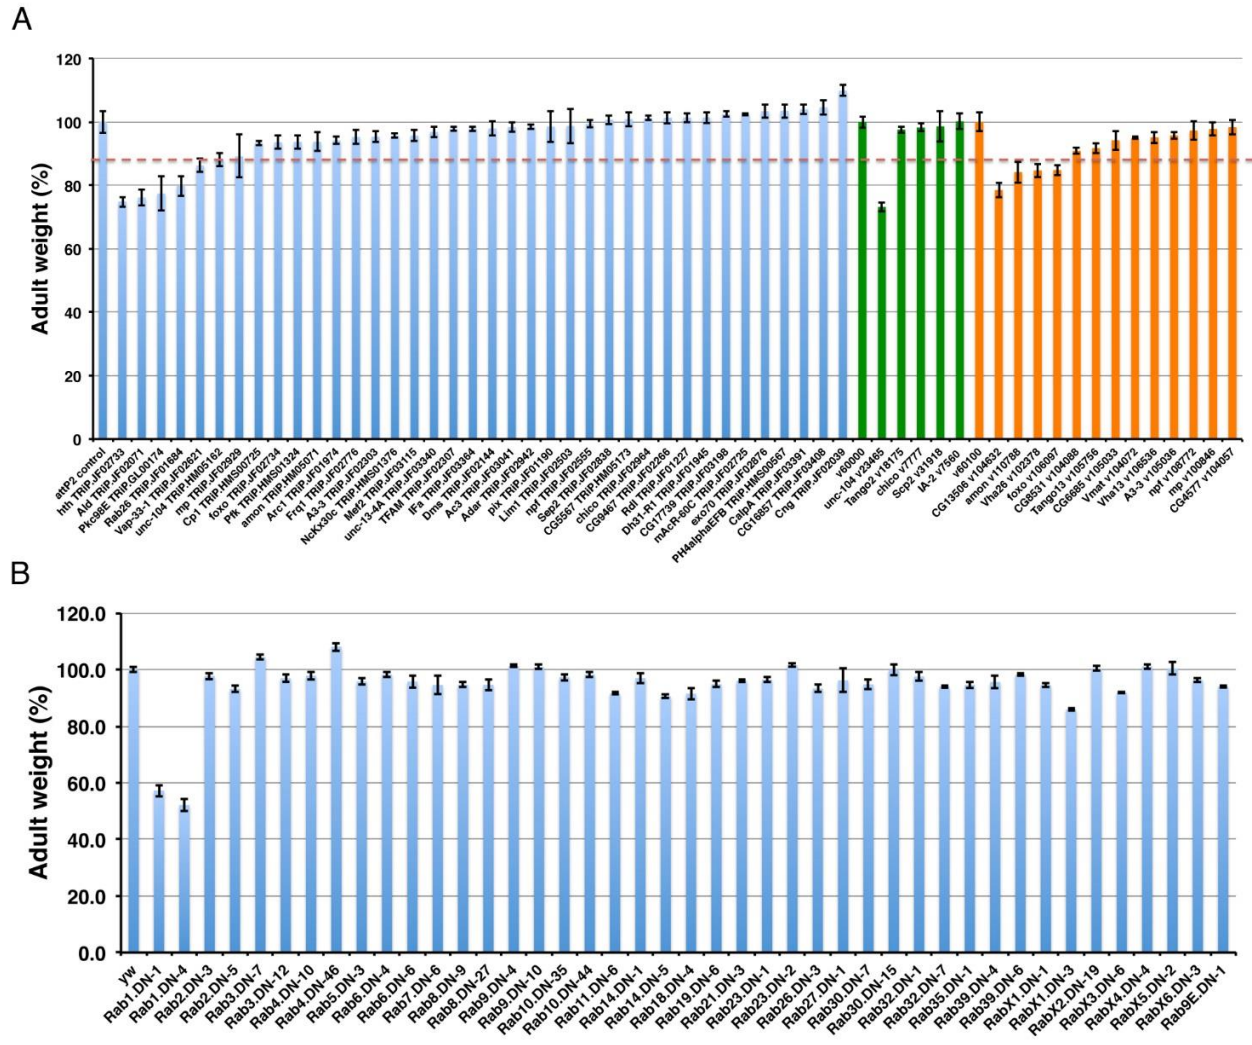

**Figure S1 RNAi screen of IPC-enriched genes and Rab-DNs for growth phenotypes. (A)** 56 *UAS-RNAi* lines covering 50 genes were crossed to *Ilp2-Gal4* and the progeny male adults were examined for their weights. These genes represent a wide range of molecular functions. They encode signaling molecules, transcription factors, neuropeptide receptors, motor proteins, sugar metabolic enzymes, synapse organizers, and etc. RNAi lines from different RNAi libraries are color-coded. Blue: Harvard TRiP lines; Green: VDRG GD lines; Orange: VDRG KK lines. The red-dashed line indicates the 90% adult weight cutoff. Error bars represent S.E.M. **(B)** 43 *UAS-Rab-DNs* lines covering 29 Rabs were crossed to *Ilp2-Gal4* and the progeny male adults were examined for their weight. Error bars represent S.E.M.
