# Supplementary material
Source: PubMed Central journal article supplement (PMC4012477)
Supplement: 9733df9d205a9448155457e01c5d843e_genetics.113.160663-13.pdf [file 9733df9d205a9448155457e01c5d843e_genetics.113.160663-13.pdf]

**Table S6** *Drosophila* stocks used in this study.

|                                                                 |                            |                                             |
|-----------------------------------------------------------------|----------------------------|---------------------------------------------|
| <i>yw</i>                                                       | <i>UAS YFP.Rab2 DN-5</i>   | <i>UAS YFP.Rab23 DN-2</i>                   |
| <i>w<sup>1118</sup></i>                                         | <i>UAS YFP.Rab3 DN-7</i>   | <i>UAS YFP.Rab26 DN-3</i>                   |
| <i>Ilp2-Gal4/Cy</i> (Eric Rulifson)                             | <i>UAS YFP.Rab3 DN-12</i>  | <i>UAS YFP.Rab27 DN-1</i>                   |
| <i>UAS-GFP-myc-2xFYVE</i> (Bloomington)                         | <i>UAS YFP.Rab4 DN-10</i>  | <i>UAS YFP.Rab30 DN-7</i>                   |
| <i>UAS-Grasp65-GFP</i> (Bloomington)                            | <i>UAS YFP.Rab 4 DN-46</i> | <i>UAS YFP.Rab30 DN-15</i>                  |
| <i>UAS-mCD8-GFP</i> (Liquan Luo)                                | <i>UAS YFP.Rab5 DN-3</i>   | <i>UAS YFP.Rab32 DN-1</i>                   |
| <i>UAS-mtdTomato</i> (Liquan Luo)                               | <i>UAS YFP.Rab6 DN-4</i>   | <i>UAS YFP.Rab32 DN-7</i>                   |
| <i>UAS- nuclear-RFP</i> (Liquan Luo)                            | <i>UAS YFP.Rab6 DN-6</i>   | <i>UAS YFP.Rab35 DN-1</i>                   |
| <i>UAS-Tau-LacZ</i> (Bloomington)                               | <i>UAS YFP.Rab7 DN-6</i>   | <i>UAS YFP.Rab39 DN-4</i>                   |
| <i>UAS-Khc::nod-LacZ</i> (Bloomington)                          | <i>UAS YFP.Rab8 DN-9</i>   | <i>UAS YFP.Rab39 DN-6</i>                   |
| <i>UAS-dicer2</i> (VDRC)                                        | <i>UAS YFP.Rab8 DN-27</i>  | <i>UAS YFP.RabX1 DN-1</i>                   |
| <i>yv; attP2, y+</i> (control for TRiP RNAi lines, Bloomington) | <i>UAS YFP.Rab9 DN-4</i>   | <i>UAS YFP.RabX1 DN-3</i>                   |
| <i>UAS-lamin-GFP</i> (Bloomington)                              | <i>UAS YFP.Rab9 DN-10</i>  | <i>UAS YFP.RabX2 DN-19</i>                  |
| <i>Rab1-Gal4</i> (Robin Hiesinger)                              | <i>UAS YFP.Rab10 DN-35</i> | <i>UAS YFP.RabX3 DN-6</i>                   |
| <i>Ilp2-Gal4</i> (Ping Shen)                                    | <i>UAS YFP.Rab10 DN-44</i> | <i>UAS YFP.RabX4 DN-4</i>                   |
| <i>UAS-unc-104-GFP</i> (Bill Saxton)                            | <i>UAS YFP.Rab11 DN-6</i>  | <i>UAS YFP.RabX5 DN-2</i>                   |
| <i>UAS-unc-104-mCherry-HA</i> (Tom Schwarz)                     | <i>UAS YFP.Rab14 DN-1</i>  | <i>UAS YFP.RabX6 DN-3</i>                   |
| <i>UAS-ANF-GFP</i> (Bill Saxton)                                | <i>UAS YFP.Rab14 DN-5</i>  | <i>UAS YFP.Rab9E DN-1</i>                   |
| <i>Elav-Gal4</i> (Bloomington)                                  | <i>UAS YFP.Rab18 DN-4</i>  | <i>UAS YFP.Rab1 WT-1</i>                    |
| <i>UAS YFP.Rab1 DN-1</i>                                        | <i>UAS YFP.Rab19 DN-6</i>  | VDRC RNAi lines                             |
| <i>UAS YFP.Rab1 DN-4</i>                                        | <i>UAS YFP.Rab21 DN-3</i>  | TRiP RNAi lines                             |
| <i>UAS YFP.Rab2 DN-3</i>                                        | <i>UAS YFP.Rab23 DN-1</i>  | <i>tub-Gal80<sup>ts</sup></i> (Bloomington) |
